# Supplementary material
Source: ML conference proceedings conference paper supplement (https://openreview.net/forum?id=ZV9XDgmTvf)
Supplement: supplementary_material [file attachment]

|     |                                                                             |     |
|-----|-----------------------------------------------------------------------------|-----|
| 001 | <b>1. Supplementary</b>                                                     |     |
| 002 | <b>A. Related work</b>                                                      |     |
| 003 | We situate our work amongst tool-use research.                              |     |
| 004 | <b>Planning evaluations.</b> Although many tool-use variants                |     |
| 005 | have been proposed, evaluating LLMs on tool-use still                       |     |
| 006 | lacks a standardized protocol. For instance, VisProg and                    |     |
| 007 | ViperGPT evaluate their plan’s <i>executions</i> on vision tasks            |     |
| 008 | using a Python-like <i>code</i> format [6, 24]. HuggingGPT evalu-           |     |
| 009 | ates only the <i>plan</i> accuracy (did the agent choose the right          |     |
| 010 | tools) without executing the proposed plans [18]. Tool-                     |     |
| 011 | Former [17] and ToolLLaMA [14] both use <i>natural lan-</i>                 |     |
| 012 | <i>guage</i> instead of <i>code</i> to interface with tools; while Tool-    |     |
| 013 | Former generates a <i>multi-step</i> plan all at once and evaluates         |     |
| 014 | the program’s <i>execution</i> , ToolLLaMA generates the plan               |     |
| 015 | <i>step-by-step</i> , with <i>self-feedback</i> to correct mistakes. ToolL- |     |
| 016 | LaMA evaluates only the <i>plans</i> while ToolFormer evaluates             |     |
| 017 | both <i>plans</i> and <i>executions</i> . Unfortunately, no single bench-   |     |
| 018 | mark evaluates planning agents along this combinatorial de-                 |     |
| 019 | sign space, which is what we contribute.                                    |     |
| 020 | <b>Tool-use benchmarks.</b> Today, tool-use evaluation is spread            |     |
| 021 | out across a number of diverse benchmarks, including Hot-                   |     |
| 022 | potQA, WebShop, GQA, RefCOCO, and NLVR [9, 10, 22,                          |     |
| 023 | 32, 33]. None of these contains ground truth plans, conflating              |     |
| 024 | planning errors with execution error. In other words,                       |     |
| 025 | it is hard to separate whether an LLM failed to propose                     |     |
| 026 | the correct plan or whether one of the tools used in the                    |     |
| 027 | plan failed. In response, recent concurrent efforts have pro-               |     |
| 028 | posed new benchmarks, such as ToolEmu, TaskBench, and                       |     |
| 029 | GAIA [12, 16, 19]. They do contain ground truth plans but                   |     |
| 030 | fail to support evaluating plans’ execution results (Table 1).              |     |
| 031 | <b>Planning strategies.</b> There are multiple strategies for plan-         |     |
| 032 | ning. For instance, Psychology literature reveals that peo-                 |     |
| 033 | ple rarely plan tasks in their entirety due to the cognitive                |     |
| 034 | cost of planning long-range tasks [3]. Instead, they plan                   |     |
| 035 | the first couple of subtasks, and execute them before plan-                 |     |
| 036 | ning the rest [1, 3]. In the tool-use literature, we identify               |     |
| 037 | two primary forms of planning strategies: <i>step-by-step</i>               |     |
| 038 | <i>planning</i> [4, 14, 35] and <i>multi-step planning</i> [6, 18, 24].     |     |
| 039 | Similar to people, step-by-step planning generates plans se-                |     |
| 040 | quentially with one subtask at a time. By contrast, multi-                  |     |
| 041 | step planning creates the entire plan before executing any                  |     |
| 042 | subtask. Unfortunately, these two strategies have not been                  |     |
| 043 | systematically compared; we systematically compare both                     |     |
| 044 | across multiple open-source and close-source LLMs.                          |     |
| 045 | <b>Feedback mechanisms.</b> LLM planners make mistakes,                     |     |
| 046 | stitching together tools that fail to execute or worse, fail                |     |
| 047 | to compile. Although human feedback is one mecha-                           |     |
| 048 | nism to align plans with human expectations and prefer-                     |     |
| 049 | ences [2, 28], they require real users, making evalua-                      |     |
| 050 | tion stochastic. However, there have been several auto-                     |     |
| 051 | matic mechanisms that can improve plans [27, 36]. For                       |     |
| 052 | instance, syntactic mistakes can easily be detected using                   |     |
|     | external <i>verifiers</i> and can guide planners to iterate on their        | 053 |
|     | plans [7, 11, 13, 20]. Others require examining the output                  | 054 |
|     | of individual subtask <i>executions</i> [15, 23, 26, 35, 37]. In            | 055 |
|     | this work, we compare plan parsing/verification feedback                    | 056 |
|     | as well as tool execution feedback.                                         | 057 |
|     | <b>B. Limitations</b>                                                       | 058 |
|     | There are a few limitations to our benchmark and evalu-                     | 059 |
|     | ation. First, <i>m&amp;m</i> ’s only considers sequential task plans,       | 060 |
|     | which represent a majority of real-world user requests.                     | 061 |
|     | However, some tasks might require dynamic task plans de-                    | 062 |
|     | pending on the output for one subtask [5]. Dynamic plans                    | 063 |
|     | require a more complex tool graph sampling procedure.                       | 064 |
|     | Second, as our main goal is to study the effects of differ-                 | 065 |
|     | ent planning formulations and types of feedback, we do not                  | 066 |
|     | investigate another dimension of planning design: prompt                    | 067 |
|     | style. We use direct and ReACT-style [35] prompting and                     | 068 |
|     | exclude more sophisticated prompting strategies such as                     | 069 |
|     | tree-of-thoughts prompting [29, 34]. Third, a few tools                     | 070 |
|     | in our benchmark are generative, which makes the eval-                      | 071 |
|     | uation of the actual execution results subjective (See Ap-                  | 072 |
|     | pendix) [21, 25].                                                           | 073 |
|     | <b>C. Additional data</b>                                                   | 074 |
|     | We present more examples of query-plan pairs of <i>m&amp;m</i> ’s in        | 075 |
|     | Figure 1, and a complete list of all 33 tools in Table 2.                   | 076 |
|     | <b>D. Dataset generation</b>                                                | 077 |
|     | It is worth noting that two of the steps in our dataset gen-                | 078 |
|     | eration pipeline draw similarities with the recently released               | 079 |
|     | concurrent TaskBench [19]. Similar to them, we also sam-                    | 080 |
|     | ple a subgraph of tools and query generation steps. How-                    | 081 |
|     | ever, we want to highlight two major differences: first, we                 | 082 |
|     | leverage real-world examples as inputs to the tool sequences                | 083 |
|     | (in contrast to TaskBench’s “example.jpg”, “example.wav”                    | 084 |
|     | etc.), which not only leads to a more realistic instantiation               | 085 |
|     | of queries but also enables plan execution on actual input                  | 086 |
|     | which is crucial for studying the role of feedback in plan-                 | 087 |
|     | ning agents. Second, we use a rule-based program instead                    | 088 |
|     | of GPT-4 to obtain the ground truth plans based on the sam-                 | 089 |
|     | pled tool sequences, which eliminates the possibility of hal-               | 090 |
|     | lucinated and incorrect plans.                                              | 091 |
|     | Below, we provide additional details about our dataset                      | 092 |
|     | generation:                                                                 | 093 |
|     | <b>D.1. Prompts</b>                                                         | 094 |
|     | We generate the queries with the prompt in Figure 2, and                    | 095 |
|     | rewrite the argument values of <code>text generation</code> and             | 096 |
|     | <code>image generation</code> with the prompt shown in Figure               | 097 |
|     | 3.                                                                          | 098 |

Table 1. Compared to previous tool planning benchmarks, *m&m*'s contains multimodal queries that are more realistic and executable. \*: MetaTool only considers Open AI plugins as tools. #: The queries of TaskBench contain textural placeholder of other modality data such as images, while queries of *m&m*'s come with real images.

|       |                           | ToolBench<br>[14] | ToolEmu<br>[16] | TaskBench<br>[19] | MetaTool<br>[8] | <i>m&amp;m</i> 's<br>(ours) |
|-------|---------------------------|-------------------|-----------------|-------------------|-----------------|-----------------------------|
| Query | Real multi-modal inputs?  | ✗                 | ✗               | ✗#                | ✗               | ✓                           |
|       | Verified by human?        | ✗                 | ✓               | ✓                 | ✓               | ✓                           |
| Tools | Are all tools executable? | ✓                 | ✗               | ✗                 | ✓               | ✓                           |
|       | Multi-modal models        | ✗                 | ✗               | ✓                 | *               | ✓                           |
| Plan  | Format                    | JSON              | JSON            | JSON              | JSON            | JSON/Code                   |
| Scale | Number of unique tools    | 3,451             | 36              | 103               | 390             | 33                          |
|       | Number of queries         | 126k              | 144             | 17K               | 20k             | 1.5k                        |

Table 2. We list all 33 tools across three categories - ML models, public APIs, and image processing modules - in *m&m*'s.

| Tool category    | Tool name                                                                                                                                                                                                                                                                           |
|------------------|-------------------------------------------------------------------------------------------------------------------------------------------------------------------------------------------------------------------------------------------------------------------------------------|
| ML model         | text generation, text summarization, text classification, question answering, optical character recognition, image generation, image editing, image captioning, image classification, image segmentation, object detection, visual question answering, automatic speech recognition |
| Public APIs      | get weather, get location, get math fact, get trivia fact, get year fact, get date fact, search movie, love calculator, wikipedia simple search                                                                                                                                     |
| Image processing | image crop, image crop top, image crop bottom, image crop left, image crop right, select object, count, tag, color pop, emoji, background blur                                                                                                                                      |

## 099 D.2. Human verification statistics

100 The pairwise agreement rates among the 3 annotators are  
101 74.95%, 81.43%, 70.88%, and the average pairwise agree-  
102 ment rate is 75.75% (std=4.34%).

## 103 D.3. Data filtering

104 We perform two types of data filtering on the 1565 human-  
105 verified examples: (1) we manually filter out 349 examples  
106 with poor execution results, especially those where inter-  
107 mediate tools return wrong or empty outputs (e.g. when  
108 question answering is the second tool in the se-  
109 quence and outputs an empty string); (2) we filter out  
110 a total of 334 examples whose plans involve image  
111 generation and have more than 4 unique queries. We  
112 perform the second filtering step because of two reasons.  
113 First, the frequency of the tools initially follows the distribu-  
114 tion in Figure 4 (blue), where image generation has a  
115 much higher count – 918 – than other tools. Thus, we would  
116 like to reduce the frequency of image generation in  
117 the dataset while maintaining the frequency of rare tools.  
118 To achieve this while also preserving the diversity of tool  
119 plans, we choose to filter out examples whose plans have 5-  
120 10 unique queries, as the average number of unique requests  
121 per tool plan before filtering is 4.20. We end up filtering out  
122 40% (or 349) of these examples. After these two filtering

steps, we are left with 882 examples in total that follow the  
distribution in Figure 4 (red).

## D.4. Alternative plans

In addition to the one human verified groundtruth plan,  
we have also generated alternative plans to supplement our  
evaluation. Concretely, we generate these alternative plans  
in three steps: first, we generate a set of syntactically valid  
(i.e. the alternative tool's input and output types are cor-  
rect) and semantically valid (i.e. the alternative tool per-  
forms the same functionality as the original tool) alterna-  
tive tools for each tool in our toolset; second, we manu-  
ally verify their validity and only keep the human-verified  
valid tools in the alternative tools set; finally, we compose  
all valid tools at each position in the plan to obtain all  
combinations as the total set of valid plans. To generate  
the syntactically valid tools, we create a graph with both  
data (including input and output) and tools as nodes, and  
we obtain the syntactic alternative tools  $t_o^{alt}$  of the orig-  
inal tool  $t_o$  by searching for all possible paths from  $t_o$ 's  
input to its output. As for semantic alternative tools, we  
prompt GPT-4 to generate these for each tool in the toolset.  
For example, for the plan image classification  
→ text generation, we first obtain alternative tools  
to each of them. For image classification, its

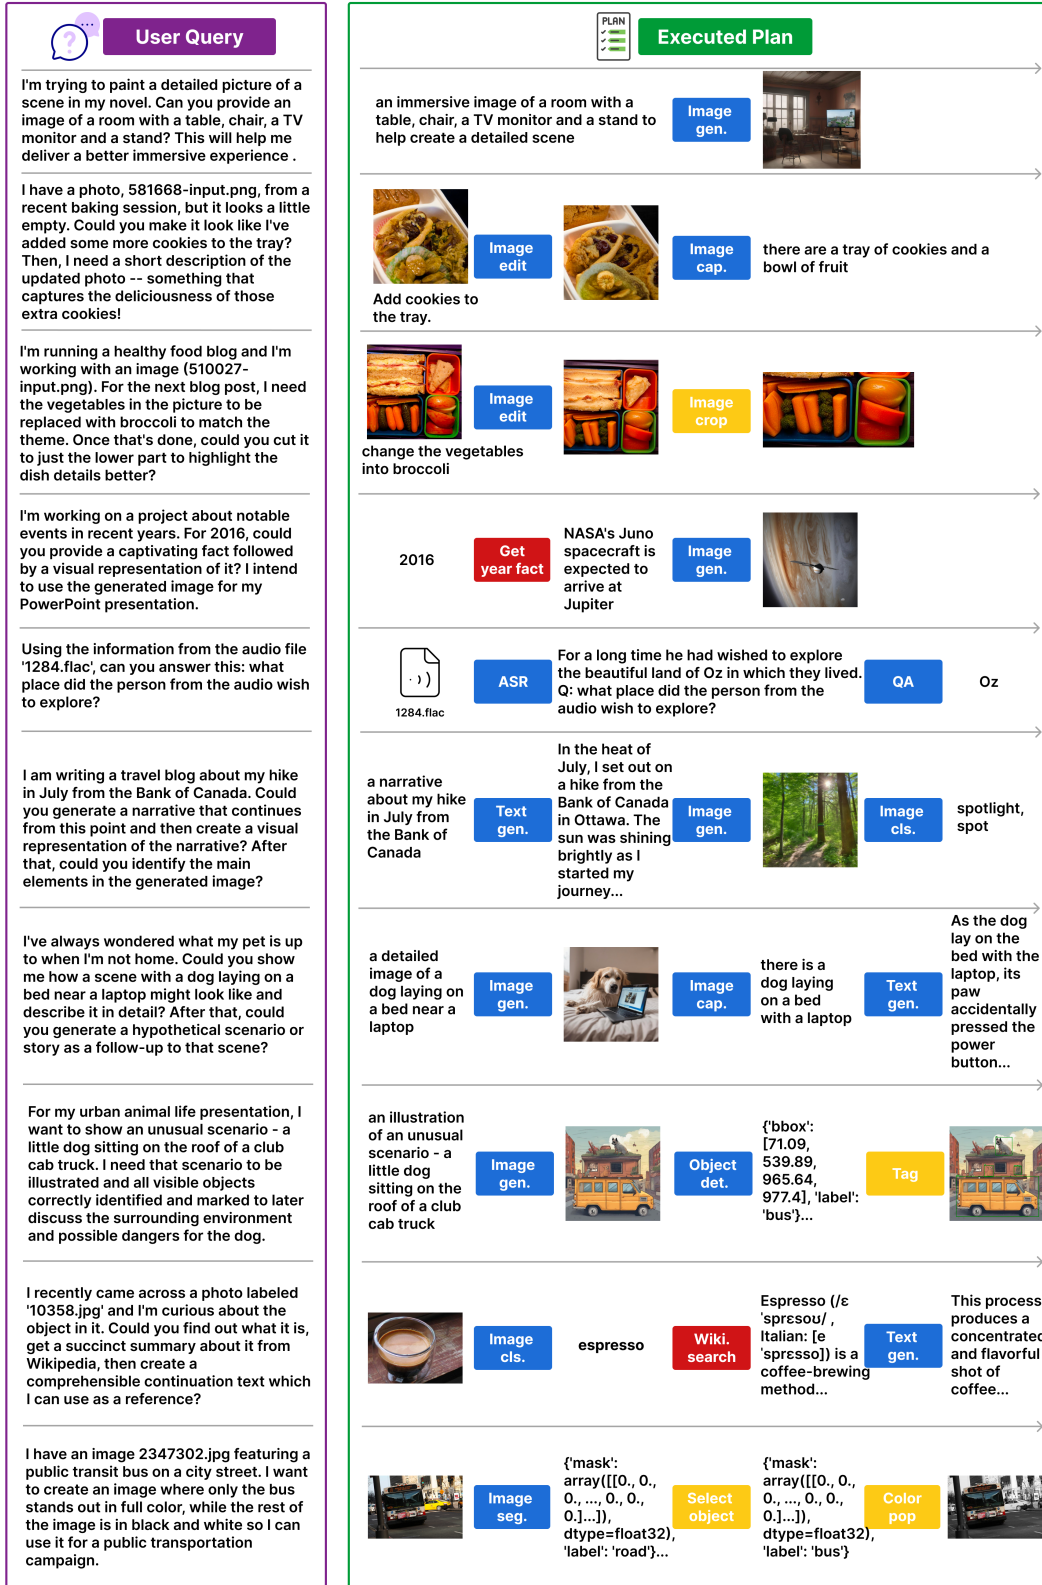

Figure 1. We present additional examples of query-plan pairs along with the execution results of the plans in  $m\&m$ 's.

I have these tools:

image classification: It takes an image and classifies the subject in the image into a category such as cat or dog.

wikipedia simple search: Perform a basic search query on Wikipedia to retrieve a summary of the most relevant page.

Can you write 2 example queries for tasks I can do with a combined workflow of image classification, followed by wikipedia simple search?

There are a few requirements:

1) Each task query should sound natural, represent a realistic use case, and should NOT mention image classification, wikipedia simple search.

2) Each query should be based on these inputs to image classification: {'image': '16611.jpg'} and should explicitly mention these inputs.

Figure 2. **Query generation prompt.** We present the full prompt used for query generation.

Table 3. We present the tool-F1, argname-F1 and pass rate of models with various feedback, where P, V, and E represent parsing, verification, and execution feedback respectively. We use no feedback only (N/A) under multi-step planning and JSON-format language generation as the basis, while showing the  $\Delta$  of those with other feedback combinations compared to no feedback.

| model              | tool-F1 |       |       |       |       | argname-F1 |       |       |       |      | pass rate |      |       |       |       |
|--------------------|---------|-------|-------|-------|-------|------------|-------|-------|-------|------|-----------|------|-------|-------|-------|
|                    | N/A     | P     | PV    | PE    | PVE   | N/A        | P     | PV    | PE    | PVE  | N/A       | P    | PV    | PE    | PVE   |
| Llama-2-7b         | 27.37   | 2.41  | -0.53 | -0.18 | -0.18 | 30.71      | 3.31  | 5.34  | 4.56  | 4.47 | 24.83     | 3.40 | 21.54 | 13.72 | 17.12 |
| Llama-2-13b        | 40.30   | 1.97  | -1.48 | -0.80 | -2.60 | 43.30      | 1.77  | 5.72  | 4.86  | 5.06 | 37.30     | 0.79 | 30.73 | 33.79 | 24.72 |
| Mixtral-8x7B       | 65.06   | 1.73  | 0.88  | 0.15  | 2.75  | 73.00      | -0.49 | 1.12  | -0.14 | 0.85 | 69.61     | 6.12 | 16.44 | 15.08 | 16.89 |
| Gemini-pro         | 68.57   | 0.80  | 1.98  | 0.69  | 0.76  | 72.79      | 0.58  | 2.58  | 2.47  | 3.30 | 73.92     | 3.40 | 16.67 | 17.46 | 20.07 |
| GPT-3.5-turbo-0125 | 79.83   | 0.68  | 0.03  | -2.11 | -1.88 | 83.94      | 0.92  | 1.57  | 0.00  | 0.06 | 88.44     | 1.02 | 7.71  | 8.28  | 7.94  |
| GPT-4-0125-preview | 88.96   | -0.50 | -1.10 | -0.26 | -1.42 | 89.88      | -0.07 | -0.25 | 0.41  | 0.25 | 97.39     | 0.34 | 1.47  | -0.91 | 2.49  |

147 syntactic alternative tools include image captioning  
 148 and visual question answering as these tools' in-  
 149 puts both include one image and their outputs are a text  
 150 - the same as image classification's. In addi-  
 151 tion, GPT-4 identifies object detection as a seman-  
 152 tic alternative to image classification. On the  
 153 other hand, there are no human-verified alternative tools to  
 154 text generation. Therefore, there are a total of 3 al-  
 155 ternative plans to image classification  $\rightarrow$  text  
 156 generation.

## 157 E. Planning agent

158 To systematically evaluate the design space of planning  
 159 agents, we design a modular planning system with these  
 160 components: planning LLM, parser, verifier, and executor.  
 161 We implement this system with AutoGen's framework [30].  
 162 Given the user query, the LLM must iteratively generate  
 163 and refine the plan. Each iteration involves generating  
 164 the whole or a part of the plan and receiving feedback  
 165 on the generation. Given the raw text output from the  
 166 LLM planner at the current iteration, *m&m*'s supports the  
 167 following 3 kinds of feedback (Figure 9):  
 168

169 **Parsing feedback.** The parser attempts to parse the LLM  
 170 text output to either JSON or code formats and returns an  
 171 error message in case of parsing failures.

172 **Plan verification feedback.** The verifier checks the parsed  
 173 output according to pre-defined rules and returns an error  
 174 message in case of rule violations. Specifically, the verifier  
 175 checks if the predicted tool exists in our provided tool list,  
 176 if it forms a valid connection with the previous tool, and if  
 177 the predicted argument names match the ones specified in  
 178 the metadata document.  
 179

180 **Plan execution feedback.** In the case of JSON output, the  
 181 executor calls the functions with specified arguments in a  
 182 Python environment and returns the output or execution er-  
 183 rors. In the case of code output, the code is directly executed  
 184 with outputs or errors returned as feedback.  
 185

186 We provide concrete examples of the parsing, verifica-  
 187 tion and Execution feedback in Figure 9.

188 We present a side-by-side comparison of (Figure 5) as  
 189 well as the full prompts used for multi-step JSON-format  
 190 planning (Figure 6), step-by-step JSON-format planning  
 191 (Figure 7, excluding details in the TOOL LIST which are  
 192 the same as the ones in Figure 6) as well as code generation  
 193 (Figure 8).

## 194 F. Qualitative analysis

195 Through qualitative analysis, we find out the common errors  
 196 that lead to the findings. First, regarding the performance



**# INSTRUCTION #:**

A tool node is defined as a dictionary with keys "id" storing its unique identifier, "name" specifying the model to call, and "args" specifying the arguments needed to make an inference call to this tool.

Your task is to rewrite ONLY the 'text' values in the tool nodes 'text generation' and 'image generation' based on the user request so that they are more concrete and aligned with user's intentions.

Below are a few examples:

**# EXAMPLES #:**

Request: I'm creating an educational video about the world's fastest vehicles and I need material on watercrafts. Could you provide me with a thorough explanation and some engaging facts on What's The Fastest Boat Ever Made?

Nodes: [{"id": 0, "name": "text generation", "args": {"text": "What's The Fastest Boat Ever Made?"}}]

New nodes: [{"id": 0, "name": "text generation", "args": {"text": " a thorough explanation and some engaging facts on \"What's The Fastest Boat Ever Made?\""}}]

Request: I would like to create a dynamic visual for my blog post about baseball. The text description I have is 'There is a baseball player who swung for the ball'. Could we use that to come up with something eye-catching and fitting for the topic?

Nodes: [{"id": 0, "name": "image generation", "args": {"text": "There is a baseball player who swung for the ball"}}]

New nodes: [{"id": 0, "name": "image generation", "args": {"text": "a dynamic and eye-catching image of a baseball player who swung for the ball"}}]

Request: For a blog topic heading 'What Really Happens When You Flush on an Airplane?', I'm trying to explain the process visually to my readers. Could you first generate a comprehensive, easy-to-understand description of the process, and then create an illustrative image based on that description?

Nodes: [{"id": 0, "name": "text generation", "args": {"text": "What Really Happens When You Flush on an Airplane?"}}, {"id": 1, "name": "image generation", "args": {"text": "<node-0>.text"}}]

New nodes: [{"id": 0, "name": "text generation", "args": {"text": "a comprehensive, easy-to-understand description of What Really Happens When You Flush on an Airplane?"}}, {"id": 1, "name": "image generation", "args": {"text": "an illustrative image based on <node-0>.text"}}]

**# REQUIREMENTS #:**

- 1) Besides the argument values of 'text generation' and 'image generation', everything else (including the nodes' ids and names) must stay the same;
- 2) The argument value can include reference to last node i's text output as <node-i>.text.
- 3) You must NOT add or remove any nodes.

Request: "I need to give a quick presentation for kindergarteners on 'Why is the sky blue?'. I don't really have time to sift through lots of complex information and I need simple, straightforward explanations with a relevant image that kids can understand. Can you assist me with that?"

Nodes: [{"id": 0, "name": "wikipedia simple search", "args": {"text": "Why is the sky blue"}}, {"id": 1, "name": "text summarization", "args": {"text": "<node-0>.text"}}, {"id": 2, "name": "image generation", "args": {"text": "<node-1>.text"}}]

New nodes:

Figure 3. **Argument value rewrite prompt.** We present the full prompt used for rewriting the argument values of `text generation` and `image generation`.

197 drop from multi-step to step-by-step planning, we find that,  
198 when models are instructed to perform step-by-step predic-  
199 tion, they tend to output “TERMINATE” after they receive  
200 positive feedback (e.g. “Parsing/verification/execution suc-

ceeded”) from the environment, disregarding whether the  
user request has been fulfilled. This means that they often  
predict fewer steps than required and miss necessary tools  
to resolve the requests. (Figure 12 A) As for the mixed and

201  
202  
203  
204

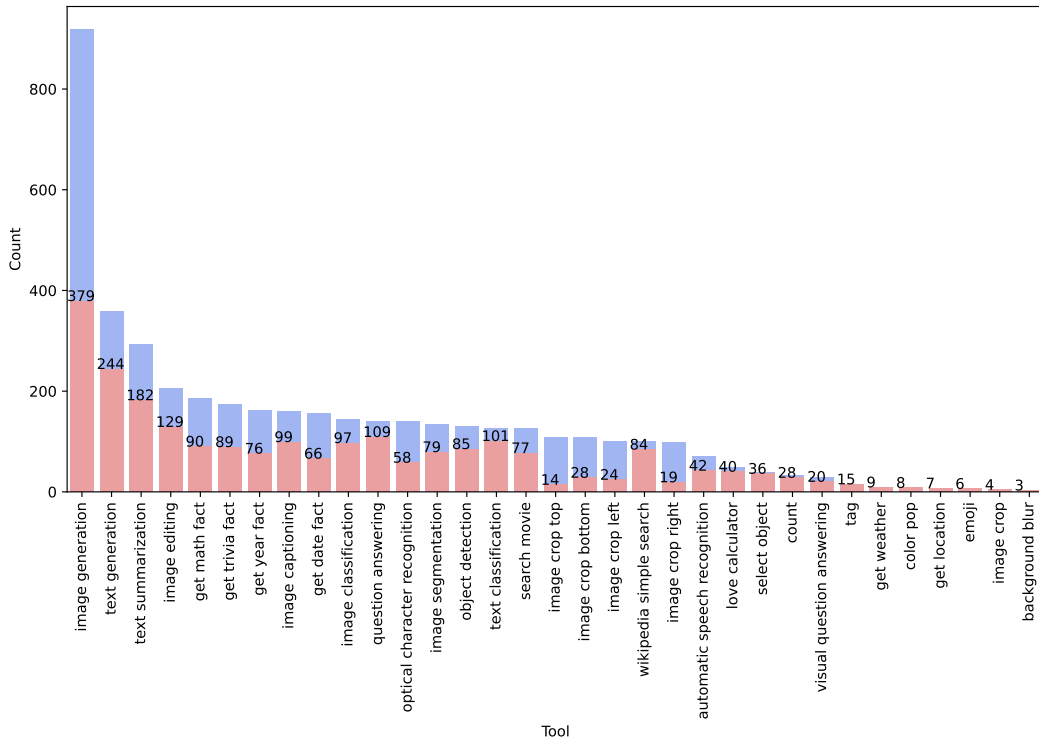

Figure 4. Tool distribution before and after filtering.

Table 4. **argvalue-F1**. We present the argvalue-F1 of step-by-step and multi-step planning with JSON-format generation and different types of feedback.

| model              | strategy     | argvalue-F1 |       |       |       |
|--------------------|--------------|-------------|-------|-------|-------|
|                    |              | P           | PV    | PE    | PVE   |
| Llama-2-7b         | step-by-step | 4.63        | 8.28  | 9.68  | 9.57  |
|                    | multi-step   | 10.34       | 9.88  | 9.47  | 10.57 |
| Llama-2-13b        | step-by-step | 7.10        | 11.30 | 12.59 | 12.64 |
|                    | multi-step   | 15.39       | 17.11 | 15.84 | 16.71 |
| Mixtral-8x7B       | step-by-step | 20.44       | 24.32 | 21.77 | 21.69 |
|                    | multi-step   | 36.45       | 36.70 | 35.70 | 36.73 |
| Gemini-pro         | step-by-step | 32.28       | 27.81 | 32.22 | 31.37 |
|                    | multi-step   | 37.22       | 39.89 | 36.30 | 38.33 |
| GPT-3.5-turbo-0125 | step-by-step | 29.58       | 28.32 | 23.61 | 23.24 |
|                    | multi-step   | 45.64       | 46.54 | 45.15 | 45.56 |
| GPT-4-0125-preview | step-by-step | 47.37       | 46.91 | 34.49 | 34.84 |
|                    | multi-step   | 51.02       | 51.08 | 51.70 | 51.99 |

205 even negative effects of feedback, we learn that this is be-  
 206 cause models can change some correct tools to the wrong  
 207 ones or remove them even though the feedback instructs  
 208 them to only fix the erroneous parts in the plan (Figure 12  
 209 B). One way to mitigate this error can be using more fine-  
 210 grained and localized feedback [31]. Additionally, neither

verification feedback nor execution feedback provides use-  
 ful information on the correctness of the tool selection and  
 increases their performance on tool-F1.

Last but not least, when it comes to code generation vs.  
 json-format generation, we find that one common execution  
 error in code generation is failing to access the output from

211  
212  
213214  
215  
216

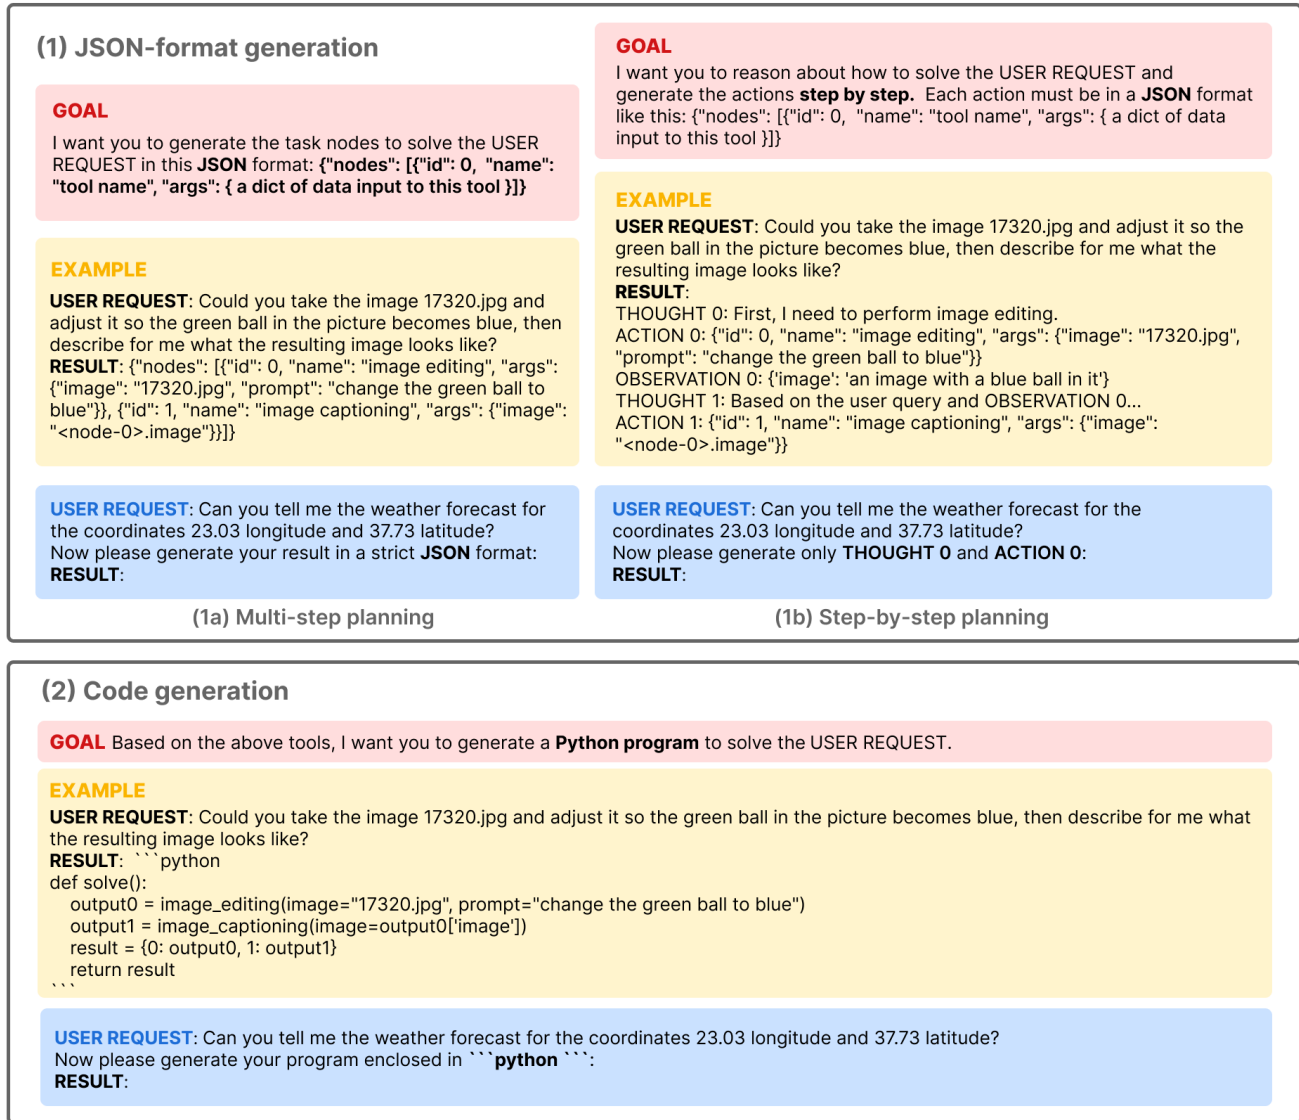

Figure 5. **Illustrating the three main planning setups in our evaluation:** (1a) multi-step and (1b) step-by-step JSON-format language generation [35], and (2) code generation. (Note that the prompts have been simplified for illustration. Please see the Appendix for the full prompts).

217 a tool (Figure 12 C), which can be due to missing the output  
 218 or accessing the output differently from what the instruction  
 219 specifies and the tool implementation expects. While the  
 220 same error also happens to JSON-format generation, it oc-  
 221 curs less frequently due to the more rigid structure of JSON.

## 222 G. Additional plan evaluation results

223 Apart from the three main metrics in the main paper, we  
 224 have also evaluated all six large language models on 10+  
 225 other metrics. We report these additional evaluation results  
 226 below.

### G.1. Pass rate vs. tool-F1

227

While we see generally positive effects of feedback on  
 argname-F1 and pass rate, we also observe that feedback  
 can lead to a small decrease (up to 4.5%) in models'  
 tool-F1. Nevertheless, we note that the decrease in tool-F1  
 with feedback is a lot smaller compared to the gains in  
 pass rate (Figure 10), which suggests feedback can greatly  
 improve tool invocation at a small cost to tool selection.

228

229

230

231

232

233

234

235

Table 5. **edge-F1**. We present the edge-F1 of step-by-step and multi-step planning with JSON-format generation and different types of feedback.

|                    |              | edge-F1 |       |       |       |
|--------------------|--------------|---------|-------|-------|-------|
| model              | strategy     | P       | PV    | PE    | PVE   |
| Llama-2-7b         | step-by-step | 1.61    | 2.35  | 3.98  | 3.37  |
|                    | multi-step   | 12.44   | 11.61 | 12.10 | 11.27 |
| Llama-2-13b        | step-by-step | 5.74    | 6.22  | 6.96  | 8.22  |
|                    | multi-step   | 23.27   | 23.98 | 24.00 | 23.58 |
| Mixtral-8x7B       | step-by-step | 15.41   | 21.88 | 24.00 | 24.77 |
|                    | multi-step   | 55.72   | 53.10 | 53.08 | 53.52 |
| Gemini-pro         | step-by-step | 41.39   | 17.86 | 45.82 | 45.08 |
|                    | multi-step   | 54.98   | 56.63 | 53.60 | 55.22 |
| GPT-3.5-turbo-0125 | step-by-step | 31.37   | 27.23 | 39.40 | 39.72 |
|                    | multi-step   | 69.52   | 71.03 | 67.98 | 69.05 |
| GPT-4-0125-preview | step-by-step | 73.68   | 72.67 | 68.28 | 68.12 |
|                    | multi-step   | 78.80   | 78.79 | 79.47 | 79.60 |

Table 6. **Normalized edit distance**. We present the normalized edit distance of step-by-step and multi-step planning with JSON-format generation and different types of feedback.

|                    |              | Normalized edit distance ↓ |       |       |       |
|--------------------|--------------|----------------------------|-------|-------|-------|
| model              | strategy     | P                          | PV    | PE    | PVE   |
| Llama-2-7b         | step-by-step | 80.39                      | 75.24 | 76.00 | 74.55 |
|                    | multi-step   | 61.14                      | 64.43 | 62.82 | 63.12 |
| Llama-2-13b        | step-by-step | 72.81                      | 68.57 | 68.60 | 67.84 |
|                    | multi-step   | 47.57                      | 48.69 | 49.63 | 49.73 |
| Mixtral-8x7B       | step-by-step | 60.81                      | 56.28 | 56.86 | 56.78 |
|                    | multi-step   | 23.97                      | 25.97 | 26.64 | 26.26 |
| Gemini-pro         | step-by-step | 36.23                      | 47.89 | 34.70 | 36.00 |
|                    | multi-step   | 28.18                      | 27.34 | 25.96 | 24.77 |
| GPT-3.5-turbo-0125 | step-by-step | 51.46                      | 52.38 | 47.93 | 47.44 |
|                    | multi-step   | 16.08                      | 15.55 | 17.44 | 17.86 |
| GPT-4-0125-preview | step-by-step | 14.26                      | 14.70 | 16.92 | 16.62 |
|                    | multi-step   | 10.96                      | 11.39 | 10.59 | 10.81 |

## 236 G.2. No feedback

237 In the main paper, we present the results of models with  
 238 verification and/or execution of feedback (on top of parsing  
 239 feedback) using the experiment with parsing (P) feedback  
 240 as a baseline. Here, we report the results using the exper-  
 241 iment with no feedback at all as the baseline in Table 3.  
 242 We see that our main takeaway remains the same with this  
 243 change: feedback helps improve models’ argname-F1 by a  
 244 small amount and pass rate by a lot, although it can lead  
 245 to a small decrease in tool-F1. We additionally observe the  
 246 improvement of verification and/or execution feedback on  
 247 pass rate is larger than that of parsing feedback.

## G.3. Step-level metrics

248 Besides tool-F1 and argname-F1, we also report the follow-  
 249 ing step-level metrics: argvalue-F1 (Table 4), edge-F1 (Ta-  
 250 ble 5), and normalized edit distance (Table 6). We adapted  
 251 TaskBench’s [19] implementation of these metrics on our  
 252 benchmark. We caution readers about argvalue-F1 as it is  
 253 computed based on exact matching to one groundtruth value  
 254 even though there can be multiple valid values. 255

## G.4. Plan-level accuracy

256 Since step-level metrics do not take into account the order-  
 257 ing of the predicted tools, we additionally include plan-level  
 258



Table 7. Plan accuracy

| model              | Plan accuracy (tool) |       |       |       |       | (tool+argname) |       |       |       |
|--------------------|----------------------|-------|-------|-------|-------|----------------|-------|-------|-------|
|                    | strategy             | P     | PV    | PE    | PVE   | P              | PV    | PE    | PVE   |
| Llama-2-7b         | step-by-step         | 1.13  | 2.27  | 3.29  | 3.29  | 1.13           | 2.27  | 3.29  | 3.29  |
|                    | multi-step           | 4.20  | 3.40  | 2.95  | 4.20  | 2.95           | 3.29  | 2.04  | 3.51  |
| Llama-2-13b        | step-by-step         | 1.25  | 3.17  | 3.74  | 4.99  | 1.13           | 3.17  | 3.74  | 4.99  |
|                    | multi-step           | 11.90 | 13.83 | 10.88 | 12.13 | 9.52           | 13.27 | 9.98  | 11.79 |
| Mixtral-8x7B       | step-by-step         | 9.41  | 14.63 | 14.06 | 14.97 | 9.41           | 14.63 | 14.06 | 14.97 |
|                    | multi-step           | 45.80 | 45.12 | 45.12 | 45.35 | 45.12          | 45.01 | 44.90 | 45.24 |
| Gemini-pro         | step-by-step         | 24.83 | 10.66 | 30.27 | 28.57 | 24.38          | 10.66 | 30.16 | 28.57 |
|                    | multi-step           | 41.84 | 42.18 | 40.70 | 42.40 | 40.48          | 42.18 | 40.59 | 42.40 |
| GPT-3.5-turbo-0125 | step-by-step         | 19.27 | 14.97 | 18.59 | 19.16 | 19.27          | 14.97 | 18.59 | 19.16 |
|                    | multi-step           | 59.64 | 60.20 | 57.48 | 58.39 | 59.52          | 60.20 | 57.48 | 58.39 |
| GPT-4-0125-preview | step-by-step         | 61.68 | 60.88 | 51.93 | 53.17 | 61.68          | 60.88 | 51.93 | 53.17 |
|                    | multi-step           | 70.63 | 69.50 | 71.43 | 70.63 | 70.63          | 69.50 | 71.43 | 70.63 |

Table 8.  $\Delta$  in plan accuracy considering alternative plans.

| model              | $\Delta$ in plan accuracy (tool) |      |      |      |      | (tool+argname) |      |      |      |
|--------------------|----------------------------------|------|------|------|------|----------------|------|------|------|
|                    | strategy                         | P    | PV   | PE   | PVE  | P              | PV   | PE   | PVE  |
| Llama-2-7b         | step-by-step                     | 0.00 | 0.11 | 0.11 | 0.11 | 0.00           | 0.11 | 0.11 | 0.11 |
|                    | multi-step                       | 0.79 | 0.34 | 0.68 | 0.57 | 0.00           | 0.11 | 0.11 | 0.23 |
| Llama-2-13b        | step-by-step                     | 0.57 | 0.57 | 0.68 | 0.91 | 0.45           | 0.57 | 0.68 | 0.91 |
|                    | multi-step                       | 1.36 | 1.47 | 1.47 | 1.47 | 0.91           | 1.36 | 1.25 | 1.25 |
| Mixtral-8x7B       | step-by-step                     | 0.79 | 2.15 | 1.93 | 2.04 | 0.79           | 1.93 | 1.93 | 1.93 |
|                    | multi-step                       | 4.08 | 3.40 | 3.74 | 2.83 | 3.40           | 3.40 | 3.29 | 2.61 |
| Gemini-pro         | step-by-step                     | 1.36 | 2.83 | 2.49 | 1.93 | 1.36           | 2.83 | 2.38 | 1.93 |
|                    | multi-step                       | 3.74 | 2.83 | 4.65 | 3.51 | 3.40           | 2.83 | 4.65 | 3.51 |
| GPT-3.5-turbo-0125 | step-by-step                     | 1.02 | 0.34 | 1.02 | 0.68 | 1.02           | 0.34 | 1.02 | 0.68 |
|                    | multi-step                       | 3.17 | 3.06 | 3.40 | 3.74 | 3.17           | 3.06 | 3.40 | 3.74 |
| GPT-4-0125-preview | step-by-step                     | 2.15 | 1.81 | 2.95 | 3.06 | 2.15           | 1.81 | 2.95 | 3.06 |
|                    | multi-step                       | 1.81 | 1.81 | 1.59 | 1.59 | 1.81           | 1.81 | 1.59 | 1.59 |

accuracy to evaluate the whole plan’s correctness (Table 7). We highlight two main variants of plan accuracy in Table 7, where the first one considers a list of tool names as a plan and the second considers a list of (tool name, argument names) tuples as a plan. As there could be multiple valid plans of the same query, we have also included the  $\Delta$  in plan accuracy considering alternative plans in Table 8 and shown that our set of alternative plans can recover 1-5% examples where the models could have output potential valid plans different from the one human-verified groundtruth plan. Finally, we also present the strictest form of plan accuracy, which considers a list of tool names, argument names and values as a plan in Table 9. We note that exact matching gives us (Table 9 left) extremely low scores while using entailment in the case of text values – if the predicted argument text entails the label text – gives us more reasonable scores (Table 9 right).

## G.5. Code-specific metrics: AST accuracy and CodeBLEU

To evaluate code generation properly, we have also included code-specific metrics such as AST accuracy and CodeBLEU (Table 10). AST accuracy measures if the AST tree of the predicted code is the same as the label code, whereas CodeBLEU measures the similarity of the predicted code to the reference code. We find that feedback, especially verification feedback, can help improve models’ AST accuracy but not necessarily CodeBLEU scores.

## G.6. Efficiency

Besides models’ planning performance, we also kept track of their token usage (Table 12) and numbers of conversation turns (Table 11). As expected, step-by-step planning generally requires more conversation turns and more tokens than multi-step planning. Similarly, feedback also increases token usage.

Table 9. Plan accuracy considering argument values

| Plan accuracy (tool+argname+argvalue) |              | exact matching |       |       |       | entailment |       |       |       |
|---------------------------------------|--------------|----------------|-------|-------|-------|------------|-------|-------|-------|
| model                                 | strategy     | P              | PV    | PE    | PVE   | P          | PV    | PE    | PVE   |
| Llama-2-7b                            | step-by-step | 0.57           | 1.02  | 1.81  | 1.59  | 0.91       | 1.81  | 2.95  | 2.38  |
|                                       | multi-step   | 0.57           | 0.34  | 0.23  | 0.57  | 1.02       | 1.59  | 0.68  | 1.59  |
| Llama-2-13b                           | step-by-step | 0.57           | 1.70  | 2.04  | 2.27  | 0.91       | 2.49  | 2.83  | 3.51  |
|                                       | multi-step   | 2.04           | 2.72  | 2.38  | 2.49  | 5.44       | 7.48  | 5.78  | 6.24  |
| Mixtral-8x7B                          | step-by-step | 2.72           | 5.44  | 3.51  | 3.51  | 6.12       | 9.86  | 7.03  | 7.37  |
|                                       | multi-step   | 9.75           | 10.09 | 9.52  | 10.77 | 28.00      | 29.14 | 28.68 | 29.48 |
| Gemini-pro                            | step-by-step | 7.03           | 5.78  | 7.48  | 6.58  | 15.42      | 9.52  | 17.12 | 15.19 |
|                                       | multi-step   | 8.39           | 11.34 | 9.07  | 11.45 | 24.15      | 27.89 | 24.83 | 27.66 |
| GPT-3.5-turbo-0125                    | step-by-step | 6.46           | 5.33  | 2.38  | 2.72  | 12.93      | 10.20 | 7.14  | 8.05  |
|                                       | multi-step   | 13.61          | 14.29 | 13.61 | 14.06 | 34.81      | 36.85 | 34.92 | 35.83 |
| GPT-4-0125-preview                    | step-by-step | 11.68          | 11.00 | 6.35  | 6.24  | 34.35      | 32.65 | 19.73 | 20.29 |
|                                       | multi-step   | 14.85          | 14.97 | 15.19 | 15.53 | 41.04      | 40.70 | 43.20 | 42.97 |

Table 10. Code-specific metrics. We present the AST accuracy and CodeBLEU score of models under multi-step planning with code generation with or without feedback.

| model              | AST accuracy |      |      |      | CodeBLEU |       |       |       |
|--------------------|--------------|------|------|------|----------|-------|-------|-------|
|                    | P            | PV   | PE   | PVE  | P        | PV    | PE    | PVE   |
| Llama-2-7b         | 0.00         | 0.00 | 0.00 | 0.00 | 22.64    | 21.28 | 17.58 | 21.19 |
| Llama-2-13b        | 0.11         | 0.23 | 0.00 | 0.00 | 29.96    | 27.09 | 20.29 | 27.62 |
| Mixtral-8x7B       | 2.04         | 3.06 | 4.22 | 2.30 | 54.17    | 48.48 | 53.01 | 47.21 |
| Gemini-pro         | 3.85         | 5.33 | 3.74 | 4.54 | 62.37    | 61.13 | 59.00 | 59.18 |
| GPT-3.5-turbo-0125 | 3.29         | 4.76 | 3.29 | 4.42 | 60.79    | 60.32 | 58.96 | 59.99 |
| GPT-4-0125-preview | 4.31         | 5.10 | 4.42 | 5.33 | 68.52    | 68.37 | 68.68 | 68.51 |

## 293 H. Human evaluation of plan execution results

294 Since *m&m*'s consists of open-ended queries, which do not  
 295 always have one single final answer, it is challenging to  
 296 evaluate the execution results of the plans automatically.  
 297 Thus, we resort to human evaluation of a small subset of  
 298 85 examples with reasonable execution results. Our manual  
 299 evaluation reveals that GPT-4 achieves the best execution  
 300 accuracy with multi-step planning and JSON-format gener-  
 301 ation compared to step-by-step planning or code generation  
 302 (Table 13). Further, we learn that our main metrics, espe-  
 303 cially pass rate, correlate well with the execution accuracy  
 304 (Figure 11).

## 305 References

- 306 [1] Kelsey R Allen, Kevin A Smith, and Joshua B Tenenbaum.  
 307 Rapid trial-and-error learning with simulation supports flex-  
 308 ible tool use and physical reasoning. *Proceedings of the Na-*  
 309 *tional Academy of Sciences*, 117(47):29302–29310, 2020. 1  
 310 [2] Po-Lin Chen and Cheng-Shang Chang. Interact: Explor-  
 311 ing the potentials of chatgpt as a cooperative agent. *arXiv*  
 312 *preprint arXiv:2308.01552*, 2023. 1  
 313 [3] Carlos G Correa, Mark K Ho, Frederick Callaway,  
 314 Nathaniel D Daw, and Thomas L Griffiths. Humans de-

- compose tasks by trading off utility and computational cost. *315*  
*PLOS Computational Biology*, 19(6):e1011087, 2023. 1 *316*  
 [4] Difei Gao, Lei Ji, Luowei Zhou, Kevin Qinghong Lin, Joya *317*  
 Chen, Zihan Fan, and Mike Zheng Shou. Assistgpt: A gen- *318*  
 eral multi-modal assistant that can plan, execute, inspect, and *319*  
 learn. *arXiv preprint arXiv:2306.08640*, 2023. 1 *320*  
 [5] Madeleine Grunde-McLaughlin, Michelle S Lam, Ranjay *321*  
 Krishna, Daniel S Weld, and Jeffrey Heer. Designing llm *322*  
 chains by adapting techniques from crowdsourcing work- *323*  
 flows. *arXiv preprint arXiv:2312.11681*, 2023. 1 *324*  
 [6] Tanmay Gupta and Aniruddha Kembhavi. Visual pro- *325*  
 gramming: Compositional visual reasoning without training, *326*  
 2022. 1 *327*  
 [7] Wenlong Huang, Fei Xia, Ted Xiao, Harris Chan, Jacky *328*  
 Liang, Pete Florence, Andy Zeng, Jonathan Tompson, Igor *329*  
 Mordatch, Yevgen Chebotar, et al. Inner monologue: Em- *330*  
 bodied reasoning through planning with language models. *331*  
*arXiv preprint arXiv:2207.05608*, 2022. 1 *332*  
 [8] Yue Huang, Jiawen Shi, Yuan Li, Chenrui Fan, Siyuan Wu, *333*  
 Qihui Zhang, Yixin Liu, Pan Zhou, Yao Wan, Neil Zhen- *334*  
 qiang Gong, et al. Metatool benchmark for large language *335*  
 models: Deciding whether to use tools and which to use. *336*  
*arXiv preprint arXiv:2310.03128*, 2023. 2 *337*  
 [9] Drew A Hudson and Christopher D Manning. Gqa: A new *338*  
 dataset for real-world visual reasoning and compositional *339*

Table 11. **Average turn count.** We present the average number of conversation turns in step-by-step and multi-step planning with JSON-format generation and different types of feedback.

| model              | strategy     | Average # of turns |      |      |      |      |
|--------------------|--------------|--------------------|------|------|------|------|
|                    |              | N/A                | P    | PV   | PE   | PVE  |
| Llama-2-7b         | step-by-step | 2.00               | 3.54 | 4.03 | 3.26 | 3.52 |
|                    | multi-step   | 1.00               | 1.10 | 2.18 | 1.95 | 1.99 |
| Llama-2-13b        | step-by-step | 2.87               | 2.87 | 3.09 | 3.06 | 2.99 |
|                    | multi-step   | 1.00               | 1.04 | 1.98 | 1.91 | 1.97 |
| Mixtral-8x7B       | step-by-step | 2.98               | 6.37 | 5.55 | 6.02 | 6.09 |
|                    | multi-step   | 1.00               | 1.14 | 2.43 | 2.74 | 2.81 |
| Gemini-pro         | step-by-step | 2.31               | 3.01 | 2.28 | 3.67 | 3.78 |
|                    | multi-step   | 1.00               | 1.20 | 1.84 | 1.80 | 1.88 |
| GPT-3.5-turbo-0125 | step-by-step | 2.40               | 3.39 | 4.10 | 5.43 | 5.30 |
|                    | multi-step   | 1.00               | 1.02 | 1.36 | 1.46 | 1.62 |
| GPT-4-0125-preview | step-by-step | 3.22               | 3.52 | 3.51 | 3.59 | 3.59 |
|                    | multi-step   | 1.00               | 1.00 | 1.05 | 1.06 | 1.07 |

Table 12. **Average number of input and output tokens**

| model              | strategy     | Avg # of input tokens |          |          |          |          | Avg # of output tokens |        |        |        |        |
|--------------------|--------------|-----------------------|----------|----------|----------|----------|------------------------|--------|--------|--------|--------|
|                    |              | N/A                   | P        | PV       | PE       | PVE      | N/A                    | P      | PV     | PE     | PVE    |
| Llama-2-7b         | step-by-step | 5497.25               | 20627.60 | 22021.08 | 14356.79 | 13562.25 | 108.54                 | 659.02 | 673.01 | 436.63 | 432.34 |
|                    | multi-step   | 2184.19               | 3065.88  | 10215.74 | 6792.83  | 8570.81  | 273.65                 | 320.95 | 735.02 | 478.79 | 636.73 |
| Llama-2-13b        | step-by-step | 13084.77              | 14793.73 | 13962.84 | 11498.10 | 13025.18 | 535.74                 | 620.00 | 495.34 | 446.56 | 489.17 |
|                    | multi-step   | 2184.19               | 2651.22  | 8141.48  | 7375.54  | 8309.38  | 326.91                 | 345.01 | 738.19 | 648.41 | 753.93 |
| Gemini-pro         | step-by-step | 5661.28               | 7651.78  | 5653.98  | 10136.36 | 10560.46 | 115.70                 | 171.22 | 96.98  | 216.03 | 232.53 |
|                    | multi-step   | 2184.19               | 3062.00  | 4962.19  | 4786.80  | 5022.53  | 86.12                  | 155.05 | 219.64 | 216.77 | 225.45 |
| GPT-3.5-turbo-0125 | step-by-step | 5891.36               | 8938.04  | 11693.37 | 16497.09 | 15966.33 | 109.61                 | 189.53 | 207.51 | 317.43 | 318.30 |
|                    | multi-step   | 2184.19               | 2247.54  | 3199.10  | 3502.05  | 4017.90  | 96.24                  | 99.47  | 136.24 | 149.94 | 166.76 |
| GPT-4-0125-preview | step-by-step | 8046.55               | 8852.87  | 8832.17  | 9601.61  | 9618.19  | 166.17                 | 172.37 | 171.03 | 235.51 | 236.76 |
|                    | multi-step   | 2184.19               | 2184.19  | 2318.98  | 2331.06  | 2354.78  | 102.28                 | 103.49 | 110.55 | 107.74 | 111.09 |

- question answering. In *Proceedings of the IEEE/CVF conference on computer vision and pattern recognition*, pages 6700–6709, 2019. 1
- [10] Sahar Kazemzadeh, Vicente Ordonez, Mark Matten, and Tamara Berg. ReferItGame: Referring to objects in photographs of natural scenes. In *Proceedings of the 2014 Conference on Empirical Methods in Natural Language Processing (EMNLP)*, pages 787–798, Doha, Qatar, 2014. Association for Computational Linguistics. 1
- [11] Aman Madaan, Niket Tandon, Prakhar Gupta, Skyler Hallinan, Luyu Gao, Sarah Wiegrefe, Uri Alon, Nouha Dziri, Shrimai Prabhumoye, Yiming Yang, et al. Self-refine: Iterative refinement with self-feedback. *Advances in Neural Information Processing Systems*, 36, 2024. 1
- [12] Grégoire Mialon, Clémentine Fourrier, Craig Swift, Thomas Wolf, Yann LeCun, and Thomas Scialom. Gaia: a benchmark for general ai assistants. *arXiv preprint arXiv:2311.12983*, 2023. 1
- [13] Ning Miao, Yee Whye Teh, and Tom Rainforth. Selfcheck: Using llms to zero-shot check their own step-by-step reasoning. *arXiv preprint arXiv:2308.00436*, 2023. 1
- [14] Yujia Qin, Shihao Liang, Yining Ye, Kunlun Zhu, Lan Yan, Yaxi Lu, Yankai Lin, Xin Cong, Xiangru Tang, Bill Qian, Sihan Zhao, Lauren Hong, Runchu Tian, Ruobing Xie, Jie Zhou, Mark Gerstein, Dahai Li, Zhiyuan Liu, and Maosong Sun. Toolllm: Facilitating large language models to master 16000+ real-world apis, 2023. 1, 2
- [15] Krishan Rana, Jesse Haviland, Sourav Garg, Jad Abou-Chakra, Ian Reid, and Niko Suenderhauf. Sayplan: Grounding large language models using 3d scene graphs for scalable task planning. *arXiv preprint arXiv:2307.06135*, 2023. 1
- [16] Yangjun Ruan, Honghua Dong, Andrew Wang, Silviu Pitis, Yongchao Zhou, Jimmy Ba, Yann Dubois, Chris J. Maddison, and Tatsunori Hashimoto. Identifying the risks of lm agents with an lm-emulated sandbox, 2023. 1, 2
- [17] Timo Schick, Jane Dwivedi-Yu, Roberto Dessi, Roberta Raileanu, Maria Lomeli, Eric Hambro, Luke Zettlemoyer, Nicola Cancedda, and Thomas Scialom. Toolformer: Language models can teach themselves to use tools. *Advances in Neural Information Processing Systems*, 36, 2024. 1
- [18] Yongliang Shen, Kaitao Song, Xu Tan, Dongsheng Li, Weiming Lu, and Yueting Zhuang. Hugginggpt: Solving ai

Table 13. **Execution results accuracy.** We present the execution results accuracy of GPT-4 and Mixtral-8x7B on a selected subset of 85 examples across different setups, including step-by-step and multi-step planning, with JSON-format and code generation, and different types of feedback.

| model              | strategy     | format | feedback | accuracy         |
|--------------------|--------------|--------|----------|------------------|
| Mixtral-8x7B       | multi-step   | JSON   | P        | $42.94 \pm 1.76$ |
| GPT-4-0125-preview | step-by-step | JSON   | P        | $49.41 \pm 1.18$ |
| GPT-4-0125-preview | multi-step   | Code   | P        | $61.18 \pm 0.0$  |
| GPT-4-0125-preview | multi-step   | JSON   | PVE      | $64.12 \pm 2.94$ |
| GPT-4-0125-preview | multi-step   | JSON   | P        | $70.00 \pm 6.47$ |

|     |                                                                                                                                                                                                                                                                                                                                                                                                                      |                                                                                                                                                                                                                                                                                                                                                                                                        |     |
|-----|----------------------------------------------------------------------------------------------------------------------------------------------------------------------------------------------------------------------------------------------------------------------------------------------------------------------------------------------------------------------------------------------------------------------|--------------------------------------------------------------------------------------------------------------------------------------------------------------------------------------------------------------------------------------------------------------------------------------------------------------------------------------------------------------------------------------------------------|-----|
| 382 | tasks with chatgpt and its friends in hugging face, 2023. <b>1</b>                                                                                                                                                                                                                                                                                                                                                   | tonomous agents. <i>arXiv preprint arXiv:2308.11432</i> , 2023. <b>1</b>                                                                                                                                                                                                                                                                                                                               | 425 |
| 383 | [19] Yongliang Shen, Kaitao Song, Xu Tan, Wenqi Zhang, Kan Ren, Siyu Yuan, Weiming Lu, Dongsheng Li, and Yueting Zhuang. Taskbench: Benchmarking large language models for task automation. <i>arXiv preprint arXiv:2311.18760</i> , 2023. <b>1, 2, 8</b>                                                                                                                                                            | [28] Xingyao Wang, Zihan Wang, Jiateng Liu, Yangyi Chen, Lifan Yuan, Hao Peng, and Heng Ji. Mint: Evaluating llms in multi-turn interaction with tools and language feedback. <i>arXiv preprint arXiv:2309.10691</i> , 2023. <b>1</b>                                                                                                                                                                  | 426 |
| 384 |                                                                                                                                                                                                                                                                                                                                                                                                                      |                                                                                                                                                                                                                                                                                                                                                                                                        | 427 |
| 385 |                                                                                                                                                                                                                                                                                                                                                                                                                      |                                                                                                                                                                                                                                                                                                                                                                                                        | 428 |
| 386 |                                                                                                                                                                                                                                                                                                                                                                                                                      |                                                                                                                                                                                                                                                                                                                                                                                                        | 429 |
| 387 |                                                                                                                                                                                                                                                                                                                                                                                                                      |                                                                                                                                                                                                                                                                                                                                                                                                        | 430 |
| 388 | [20] Noah Shinn, Beck Labash, and Ashwin Gopinath. Reflexion: an autonomous agent with dynamic memory and self-reflection. <i>arXiv preprint arXiv:2303.11366</i> , 2023. <b>1</b>                                                                                                                                                                                                                                   | [29] Xuezhi Wang, Jason Wei, Dale Schuurmans, Quoc Le, Ed Chi, Sharan Narang, Aakanksha Chowdhery, and Denny Zhou. Self-consistency improves chain of thought reasoning in language models, 2023. <b>1</b>                                                                                                                                                                                             | 431 |
| 389 |                                                                                                                                                                                                                                                                                                                                                                                                                      |                                                                                                                                                                                                                                                                                                                                                                                                        | 432 |
| 390 |                                                                                                                                                                                                                                                                                                                                                                                                                      |                                                                                                                                                                                                                                                                                                                                                                                                        | 433 |
| 391 | [21] Otilia Stretcu, Edward Vendrow, Kenji Hata, Krishnamurthy Viswanathan, Vittorio Ferrari, Sasan Tavakkol, Wenlei Zhou, Aditya Avinash, Emming Luo, Neil Gordon Alldrin, Ranjay Krishna, and Ariel Fuxman. Agile modeling: From concept to classifier in minutes. In <i>Proceedings of the IEEE/CVF International Conference on Computer Vision</i> , pages 22323–22334, 2023. <b>1</b>                           | [30] Qingyun Wu, Gagan Bansal, Jieyu Zhang, Yiran Wu, Shaokun Zhang, Erkang Zhu, Beibin Li, Li Jiang, Xiaoyun Zhang, and Chi Wang. Autogen: Enabling next-gen llm applications via multi-agent conversation framework. <i>arXiv preprint arXiv:2308.08155</i> , 2023. <b>4</b>                                                                                                                         | 434 |
| 392 |                                                                                                                                                                                                                                                                                                                                                                                                                      |                                                                                                                                                                                                                                                                                                                                                                                                        | 435 |
| 393 |                                                                                                                                                                                                                                                                                                                                                                                                                      |                                                                                                                                                                                                                                                                                                                                                                                                        | 436 |
| 394 |                                                                                                                                                                                                                                                                                                                                                                                                                      |                                                                                                                                                                                                                                                                                                                                                                                                        | 437 |
| 395 |                                                                                                                                                                                                                                                                                                                                                                                                                      |                                                                                                                                                                                                                                                                                                                                                                                                        | 438 |
| 396 |                                                                                                                                                                                                                                                                                                                                                                                                                      |                                                                                                                                                                                                                                                                                                                                                                                                        | 439 |
| 397 |                                                                                                                                                                                                                                                                                                                                                                                                                      |                                                                                                                                                                                                                                                                                                                                                                                                        | 440 |
| 398 | [22] Alane Suhr, Mike Lewis, James Yeh, and Yoav Artzi. A corpus of natural language for visual reasoning. In <i>Proceedings of the 55th Annual Meeting of the Association for Computational Linguistics (Volume 2: Short Papers)</i> , pages 217–223, Vancouver, Canada, 2017. Association for Computational Linguistics. <b>1</b>                                                                                  | [31] Zeqiu Wu, Yushi Hu, Weijia Shi, Nouha Dziri, Alane Suhr, Prithviraj Ammanabrolu, Noah A. Smith, Mari Ostendorf, and Hannaneh Hajishirzi. Fine-grained human feedback gives better rewards for language model training, 2023. <b>6</b>                                                                                                                                                             | 441 |
| 399 |                                                                                                                                                                                                                                                                                                                                                                                                                      |                                                                                                                                                                                                                                                                                                                                                                                                        | 442 |
| 400 |                                                                                                                                                                                                                                                                                                                                                                                                                      |                                                                                                                                                                                                                                                                                                                                                                                                        | 443 |
| 401 |                                                                                                                                                                                                                                                                                                                                                                                                                      |                                                                                                                                                                                                                                                                                                                                                                                                        | 444 |
| 402 |                                                                                                                                                                                                                                                                                                                                                                                                                      |                                                                                                                                                                                                                                                                                                                                                                                                        | 445 |
| 403 |                                                                                                                                                                                                                                                                                                                                                                                                                      |                                                                                                                                                                                                                                                                                                                                                                                                        | 446 |
| 404 | [23] Haotian Sun, Yuchen Zhuang, Ling kai Kong, Bo Dai, and Chao Zhang. Adaplanner: Adaptive planning from feedback with language models. <i>Advances in Neural Information Processing Systems</i> , 36, 2024. <b>1</b>                                                                                                                                                                                              | [32] Zhilin Yang, Peng Qi, Saizheng Zhang, Yoshua Bengio, William Cohen, Ruslan Salakhutdinov, and Christopher D. Manning. HotpotQA: A dataset for diverse, explainable multi-hop question answering. In <i>Proceedings of the 2018 Conference on Empirical Methods in Natural Language Processing</i> , pages 2369–2380, Brussels, Belgium, 2018. Association for Computational Linguistics. <b>1</b> | 447 |
| 405 |                                                                                                                                                                                                                                                                                                                                                                                                                      |                                                                                                                                                                                                                                                                                                                                                                                                        | 448 |
| 406 |                                                                                                                                                                                                                                                                                                                                                                                                                      |                                                                                                                                                                                                                                                                                                                                                                                                        | 449 |
| 407 |                                                                                                                                                                                                                                                                                                                                                                                                                      |                                                                                                                                                                                                                                                                                                                                                                                                        | 450 |
| 408 | [24] Dídac Surís, Sachit Menon, and Carl Vondrick. Vipergpt: Visual inference via python execution for reasoning. <i>arXiv preprint arXiv:2303.08128</i> , 2023. <b>1</b>                                                                                                                                                                                                                                            | [33] Shunyu Yao, Howard Chen, John Yang, and Karthik Narasimhan. Webshop: Towards scalable real-world web interaction with grounded language agents. <i>Advances in Neural Information Processing Systems</i> , 35:20744–20757, 2022. <b>1</b>                                                                                                                                                         | 451 |
| 409 |                                                                                                                                                                                                                                                                                                                                                                                                                      |                                                                                                                                                                                                                                                                                                                                                                                                        | 452 |
| 410 |                                                                                                                                                                                                                                                                                                                                                                                                                      |                                                                                                                                                                                                                                                                                                                                                                                                        | 453 |
| 411 |                                                                                                                                                                                                                                                                                                                                                                                                                      |                                                                                                                                                                                                                                                                                                                                                                                                        | 454 |
| 412 | [25] Imad Eddine Toubal, Aditya Avinash, Neil Gordon Alldrin, Jan Dlabal, Wenlei Zhou, Enming Luo, Otilia Stretcu, Hao Xiong, Chun-Ta Lu, Howard Zhou, Ranjay Krishna, Ariel Fuxman, and Tom Duerig. Modeling collaborator: Enabling subjective vision classification with minimal human effort via llm tool-use. In <i>Proceedings of the IEEE/CVF International Conference on Computer Vision</i> , 2024. <b>1</b> | [34] Shunyu Yao, Dian Yu, Jeffrey Zhao, Izhak Shafran, Thomas L. Griffiths, Yuan Cao, and Karthik Narasimhan. Tree of thoughts: Deliberate problem solving with large language models, 2023. <b>1</b>                                                                                                                                                                                                  | 455 |
| 413 |                                                                                                                                                                                                                                                                                                                                                                                                                      |                                                                                                                                                                                                                                                                                                                                                                                                        | 456 |
| 414 |                                                                                                                                                                                                                                                                                                                                                                                                                      |                                                                                                                                                                                                                                                                                                                                                                                                        | 457 |
| 415 |                                                                                                                                                                                                                                                                                                                                                                                                                      |                                                                                                                                                                                                                                                                                                                                                                                                        | 458 |
| 416 |                                                                                                                                                                                                                                                                                                                                                                                                                      |                                                                                                                                                                                                                                                                                                                                                                                                        | 459 |
| 417 |                                                                                                                                                                                                                                                                                                                                                                                                                      |                                                                                                                                                                                                                                                                                                                                                                                                        | 460 |
| 418 | [26] Guanzhi Wang, Yuqi Xie, Yunfan Jiang, Ajay Mandlekar, Chaowei Xiao, Yuke Zhu, Linxi Fan, and Anima Anandkumar. Voyager: An open-ended embodied agent with large language models. <i>arXiv preprint arXiv:2305.16291</i> , 2023. <b>1</b>                                                                                                                                                                        | [35] Shunyu Yao, Jeffrey Zhao, Dian Yu, Nan Du, Izhak Shafran, Karthik Narasimhan, and Yuan Cao. React: Synergizing reasoning and acting in language models, 2023. <b>1, 7</b>                                                                                                                                                                                                                         | 461 |
| 419 |                                                                                                                                                                                                                                                                                                                                                                                                                      |                                                                                                                                                                                                                                                                                                                                                                                                        | 462 |
| 420 |                                                                                                                                                                                                                                                                                                                                                                                                                      |                                                                                                                                                                                                                                                                                                                                                                                                        | 463 |
| 421 |                                                                                                                                                                                                                                                                                                                                                                                                                      |                                                                                                                                                                                                                                                                                                                                                                                                        | 464 |
| 422 | [27] Lei Wang, Chen Ma, Xueyang Feng, Zeyu Zhang, Hao Yang, Jingsen Zhang, Zhiyuan Chen, Jiakai Tang, Xu Chen, Yankai Lin, et al. A survey on large language model based au-                                                                                                                                                                                                                                         | [36] Jieyu Zhang, Ranjay Krishna, Ahmed H Awadallah, and Chi Wang. Ecoassistant: Using llm assistant more affordably and accurately. <i>arXiv preprint arXiv:2310.03046</i> , 2023. <b>1</b>                                                                                                                                                                                                           | 465 |
| 423 |                                                                                                                                                                                                                                                                                                                                                                                                                      |                                                                                                                                                                                                                                                                                                                                                                                                        | 466 |
| 424 |                                                                                                                                                                                                                                                                                                                                                                                                                      | [37] Xizhou Zhu, Yuntao Chen, Hao Tian, Chenxin Tao, Weijie Su, Chenyu Yang, Gao Huang, Bin Li, Lewei Lu, Xiao-gang Wang, et al. Ghost in the minecraft: Generally capable                                                                                                                                                                                                                             | 467 |
|     |                                                                                                                                                                                                                                                                                                                                                                                                                      |                                                                                                                                                                                                                                                                                                                                                                                                        | 468 |



469 agents for open-world environments via large language mod-  
470 els with text-based knowledge and memory. *arXiv preprint*  
471 *arXiv:2305.17144*, 2023. 1

```

# TOOL LIST #:
text generation: It takes an input text prompt and outputs a text that is most likely to follow the input text. Its input includes text, and output includes text.
text summarization: it takes a paragraph of text and summarizes into a few sentences. Its input includes text, and output includes text.
text classification: It takes a text and classifies it into a category in the model's vocabulary (e.g. positive or negative based on its sentiment). Its input includes text, and output includes text.
question answering: It takes a text and a question, and outputs an answer to that question based on the text. Its input includes text, question, and output includes text.
image generation: It takes a text prompt and generates an image that matches the text description. Its input includes text, and output includes image.
image captioning: It takes an image and generates a text caption of the image. Its input includes image, and output includes text.
optical character recognition: It takes an image and outputs recognized texts in the image. Its input includes image, and output includes text.
image classification: It takes an image and classifies the subject in the image into a category such as cat or dog. Its input includes image, and output includes text.
image editing: It takes an image and a text prompt and outputs a new image based on the text. Its input includes image, prompt, and output includes image.
object detection: It takes an image and outputs rectangular bounding boxes of objects detected in the image. Its input includes image, and output includes image, objects.
image segmentation: It takes an image, segments it into different parts, and outputs segmentation masks of any shape for the parts. Its input includes image, and output includes image, objects.
automatic speech recognition: It takes an audio file and produces a transcription of the audio. Its input includes audio, and output includes text.
visual question answering: It takes an image and a question about the image, and generates an answer to the question. Its input includes image, question, and output includes text.
image crop: It takes an image and 4 numbers representing the coordinates of a bounding box and crops the image to the region within the box. Its input includes image, object, and output includes image.
image crop left: It takes an image, crops and keeps the left part of the image. Its input includes image, and output includes image.
image crop right: It takes an image, crops and keeps the right part of the image. Its input includes image, and output includes image.
image crop top: It takes an image, crops and keeps the top part of the image. Its input includes image, and output includes image.
image crop bottom: It takes an image, crops and keeps the bottom part of the image. Its input includes image, and output includes image.
background blur: It takes an image and one or multiple objects in the foreground, and returns an image where the background is blurred. Its input includes image, object, and output includes image.
color pop: It takes an image and one or multiple objects, and returns an image where only the object is colored and the rest is black and white. Its input includes image, object and output includes image.
count: It takes a list of objects and returns the count of the objects. Its input includes objects, and output includes number.
tag: It takes an image and a list of objects with their bounding boxes and classes, and tags all the objects Its input includes image, objects, and output includes image.
select object: It takes a list of objects, and selects the object based on the input object name. Its input includes objects, object_name, and output includes object.
emoji: It takes an image and the bounding box coordinates of one or multiple objects, and replaces the object with an emoji (e.g. angry/flushed/crying/dizzy/sleepy/grimacing/kissing/smiling_face, alien, ghost, goblin etc). Its input includes image, object, emoji, and output includes image.
get date fact: It provides interesting facts about dates. Its input includes date, and output includes text.
get year fact: It provides interesting facts about years. Its input includes year, and output includes text.
get math fact: It provides interesting math facts about numbers. Its input includes number, and output includes text.
get trivia fact: It provides interesting trivia facts about number. Its input includes number, and output includes text.
love calculator: Enter your name and the name of your partner/lover/crush to find Love compatibility & chances of successful love relationship. Its input includes first_name, second_name, and output includes number.
get location: Convert a city name or address to geographical coordinates using OpenStreetMap's Nominatim API. Its input includes city, and output includes lon, lat.
search movie: Retrieve basic movie information, including title, year, genre, and director. Its input includes movie_title, movie_year, and output includes text.
get weather: Provides weather forecast data based on specific geographical coordinates. Its input includes lon, lat, and output includes objects.
wikipedia simple search: Perform a basic search query on Wikipedia to retrieve a summary of the most relevant page. Its input includes text, and output includes text.

# GOAL #: Based on the above tools, I want you to generate the task nodes to solve the # USER REQUEST #. The format must be in a strict JSON format, like: {"nodes": [{"id": an integer id of the tool, starting from 0, "name": "tool name must be from # TOOL LIST #", "args": { a dictionary of arguments for the tool. Either original text, or user-mentioned filename, or tag '<node-j>.text' (start from 0) to refer to the text output of the j-th node. }}}

# REQUIREMENTS #:
1. the generated tool nodes can resolve the given user request # USER REQUEST # perfectly. Tool name must be selected from # TOOL LIST #;
2. The arguments of a tool must be the same number, modality, and format specified in # TOOL LIST #;
3. Use as few tools as possible.

# EXAMPLE #:
# USER REQUEST #: "Based on reading the article titled 'Would you rather have an Apple Watch - or a BABY?', generate an extended paragraph on the topic."
# RESULT #: {"nodes": [{"id": 0, "name": "text generation", "args": {"text": "an extended paragraph on the topic: Would you rather have an Apple Watch - or a BABY?"}}]}
# EXAMPLE #:
# USER REQUEST #: "Could you take the image, specifically 'image 17320.jpg', and adjust it so the green ball in the picture becomes blue, then describe for me what the resulting image looks like?"
# RESULT #: {"nodes": [{"id": 0, "name": "image editing", "args": {"image": "17320.jpg", "prompt": "change the green ball to blue"}}, {"id": 1, "name": "image captioning", "args": {"image": "<node-0>.image"}}]}
# EXAMPLE #:
# USER REQUEST #: "Could you provide a brief summary of the key points discussed in the audio file '1995-1826-0002.flac' about John Taylor and his interest in cotton? And then, can you also help me create a vivid illustration based on the key points?"
# RESULT #: {"nodes": [{"id": 0, "name": "automatic speech recognition", "args": {"audio": "1995-1826-0002.flac"}}, {"id": 1, "name": "text summarization", "args": {"text": "<node-0>.text"}}, {"id": 2, "name": "image generation", "args": {"text": "a vivid illustration based on <node-1>.text"}}]}

# USER REQUEST #: "I need to give a quick presentation for kindergarteners on 'Why is the sky blue?'. I don't really have time to sift through lots of complex information and I need simple, straightforward explanations with a relevant image that kids can understand. Can you assist me with that?"
Now please generate your result in a strict JSON format:
# RESULT #:

```

Figure 6. Multi-step planning prompt. We present the full prompt used for multi-step planning.

```

# TOOL LIST #:
text generation: It takes an input text prompt and outputs a text that is most likely to follow the input text. Its input
includes text, and output includes text.
text summarization: it takes a paragraph of text and summarizes into a few sentences. Its input includes text, and
output includes text.
.....
search movie: Retrieve basic movie information, including title, year, genre, and director. Its input includes movie_title,
movie_year, and output includes text.
get weather: Provides weather forecast data based on specific geographical coordinates. Its input includes lon, lat,
and output includes objects.
wikipedia simple search: Perform a basic search query on Wikipedia to retrieve a summary of the most relevant page.
Its input includes text, and output includes text.

# GOAL #: Based on the above tools, I want you to reason about how to solve the # USER REQUEST # and generate the
actions step by step.

# REQUIREMENTS #:
1. The thoughts can be any free form texts to help with action generation;
2. The action must follow this JSON format strictly: {"id": an integer id of the tool, starting from 0, which should be the
same as the id of the ACTION "name": "tool name must be from # TOOL LIST #", "args": { a dictionary of
arguments for the tool. Either original text, or user-mentioned filename, or tag '<node-j>.text' (start from 0) to refer to
the text output of the j-th node. }};
3. The arguments of a tool must match the number, modality, and format of the tool's arguments specified in # TOOL
LIST #.
# EXAMPLE #:
# USER REQUEST #: "Based on reading the article titled 'Would you rather have an Apple Watch - or a BABY?', generate
an extended paragraph on the topic."
# RESULT #:
THOUGHT 0: First, I need to perform text generation.
ACTION 0: {"id": 0, "name": "text generation", "args": {"text": "Would you rather have an Apple Watch - or a BABY?"}}

# EXAMPLE #:
# USER REQUEST #: "Could you take the image, specifically 'image 17320.jpg', and adjust it so the green ball in the
picture becomes blue, then describe for me what the resulting
image looks like?"
# RESULT #:
THOUGHT 0: First, I need to perform image editing.
ACTION 0: {"id": 0, "name": "image editing", "args": {"image": "17320.jpg", "prompt": "change the green ball to blue"}}
OBSERVATION 0: {'text': 'an image with a blue ball in it'}
THOUGHT 1: Based on the user query and OBSERVATION 0, then, I need to perform image captioning.
ACTION 1: {"id": 1, "name": "image captioning", "args": {"image": "<node-0>.image"}}

# EXAMPLE #:
# USER REQUEST #: "Could you provide a brief summary of the key points discussed in the audio file
'1995-1826-0002.flac' about John Taylor and his interest in cotton? And then, c
an you also help me create a vivid illustration based on the key points?"
# RESULT #:
THOUGHT 0: First, I need to perform automatic speech recognition.
ACTION 0: {"id": 0, "name": "automatic speech recognition", "args": {"audio": "1995-1826-0002.flac"}}
OBSERVATION 0: {'text': 'John Taylor, who had supported her through college, was interested in cotton.'}
THOUGHT 1: Based on the user query and OBSERVATION 0, then, I need to perform text summarization.
ACTION 1: {"id": 1, "name": "text summarization", "args": {"text": "<node-0>.text"}}
OBSERVATION 1: {'text': 'John Taylor was interested in cotton.'}
THOUGHT 2: Based on the user query and OBSERVATION 1, then, I need to perform image generation.
ACTION 2: {"id": 2, "name": "image generation", "args": {"text": "a vivid illustration based on <node-1>.text"}}

# USER REQUEST #: "I need to give a quick presentation for kindergarteners on 'Why is the sky blue?'. I don't really
have time to sift through lots of complex information and I need simple, straightforward explanations with a relevant
image that kids can understand. Can you assist me with that?"
ction of it?
Now please generate only THOUGHT 0 and ACTION 0 in RESULT:
# RESULT #:

```

Figure 7. **Step-by-step planning prompt.** We present the full prompt used for step-by-step planning.

```

# TOOL LIST #:
text_generation(text) → text: It takes an input text prompt and outputs a text that is most likely to follow the input text.
text_summarization(text) → text: It takes a paragraph of text and summarizes into a few sentences.
text_classification(text) → text: It takes a text and classifies it into a category in the model's vocabulary (e.g. positive or negative based on its sentiment).
question_answering(text, question) → text: It takes a text and a question, and outputs an answer to that question based on the text.
image_generation(text) → image: It takes a text prompt and generates an image that matches the text description.
image_captioning(image) → text: It takes an image and generates a text caption of the image.
optical_character_recognition(image) → text: It takes an image and outputs recognized texts in the image.
image_classification(image) → text: It takes an image and classifies the subject in the image into a category such as cat or dog.
image_editing(image, prompt) → image: It takes an image and a text prompt and outputs a new image based on the text.
object_detection(image) → image, objects: It takes an image and outputs rectangular bounding boxes of objects detected in the image.
image_segmentation(image) → image, objects: It takes an image, segments it into different parts, and outputs segmentation masks of any shape for the parts.
automatic_speech_recognition(audio) → text: It takes an audio file and produces a transcription of the audio.
visual_question_answering(image, question) → text: It takes an image and a question about the image, and generates an answer to the question.
image_crop(image, object) → image: It takes an image and 4 numbers representing the coordinates of a bounding box and crops the image to the region within the box.
image_crop_left(image) → image: It takes an image, crops and keeps the left part of the image.
image_crop_right(image) → image: It takes an image, crops and keeps the right part of the image.
image_crop_top(image) → image: It takes an image, crops and keeps the top part of the image.
image_crop_bottom(image) → image: It takes an image, crops and keeps the bottom part of the image.
background_blur(image, object) → image: It takes an image and one or multiple objects in the foreground, and returns an image where the background is blurred.
color_pop(image, object) → image: It takes an image and one or multiple objects, and returns an image where only the object is colored and the rest is black and white.
count(objects) → number: It takes a list of objects and returns the count of the objects.
tag(image, objects) → image: It takes an image and a list of objects with their bounding boxes and classes, and tags all the objects
select_object(objects, object_name) → object: It takes a list of objects, and selects the object based on the input object name.
emoji(image, object, emoji) → image: It takes an image and the bounding box coordinates of one or multiple objects, and replaces the object with an emoji (e.g. angry/flushed/crying/dizzy/sleepy/grimacing/kissing/smiling_face, alien, ghost, goblin etc).
get_date_fact(date) → text: It provides interesting facts about dates.
get_year_fact(year) → text: It provides interesting facts about years.
get_math_fact(number) → text: It provides interesting math facts about numbers.
get_trivia_fact(number) → text: It provides interesting trivia facts about number.
love_calculator(first_name, second_name) → number: Enter your name and the name of your partner/lover/crush to find Love compatibility & chances of successful love relationship.
get_location(city) → lon, lat: Convert a city name or address to geographical coordinates using OpenStreetMap's Nominatim API.
search_movie(movie_title, movie_year) → text: Retrieve basic movie information, including title, year, genre, and director.
get_weather(lon, lat) → objects: Provides weather forecast data based on specific geographical coordinates.
wikipedia_simple_search(text) → text: Perform a basic search query on Wikipedia to retrieve a summary of the most relevant page.

# GOAL #: Based on the above tools, I want you to generate a python program to solve the # USER REQUEST #.

# REQUIREMENTS #:
1. the generated program can resolve the given user request # USER REQUEST # perfectly. The functions must be selected from # TOOL LIST #;
2. The arguments of a function must be the same number, modality, and format specified in # TOOL LIST #;
3. Use as few tools as possible.

# EXAMPLE #:
# USER REQUEST #: "Based on reading the article titled 'Would you rather have an Apple Watch - or a BABY?', generate an extended paragraph on the topic."
# RESULT #: ```python
def solve():
    output0 = text_generation(text="an extended paragraph on the topic: Would you rather have an Apple Watch - or a BABY?")
    result = {0: output0}
    return result
...

# EXAMPLE #:
# USER REQUEST #: "Could you take the image, specifically 'image 17320.jpg', and adjust it so the green ball in the picture becomes blue, then describe for me what the resulting image looks like?"
# RESULT #: ```python
def solve():
    output0 = image_editing(image="17320.jpg", prompt="change the green ball to blue")
    output1 = image_captioning(image=output0['image'])
    result = {0: output0, 1: output1}
    return result
...

# EXAMPLE #:
# USER REQUEST #: "Could you provide a brief summary of the key points discussed in the audio file '1995-1826-0002.flac' about John Taylor and his interest in cotton? And then, can you also help me create a vivid illustration based on the key points?"
# RESULT #: ```python
def solve():
    output0 = automatic_speech_recognition(audio="1995-1826-0002.flac")
    output1 = text_summarization(text=f"{output0['text']}")
    output2 = image_generation(text=f"a vivid illustration based on {output1['text']}")
    result = {0: output0, 1: output1, 2: output2}
    return result
...

# USER REQUEST #: "I need to give a quick presentation for kindergarteners on 'Why is the sky blue?'. I don't really have time to sift through lots of complex information and I need simple, straightforward explanations with a relevant image that kids can understand. Can you assist me with that?"
Now please generate your program enclosed in ```python ```:

```

Figure 8. Code generation prompt. We present the full prompt used for code generation.



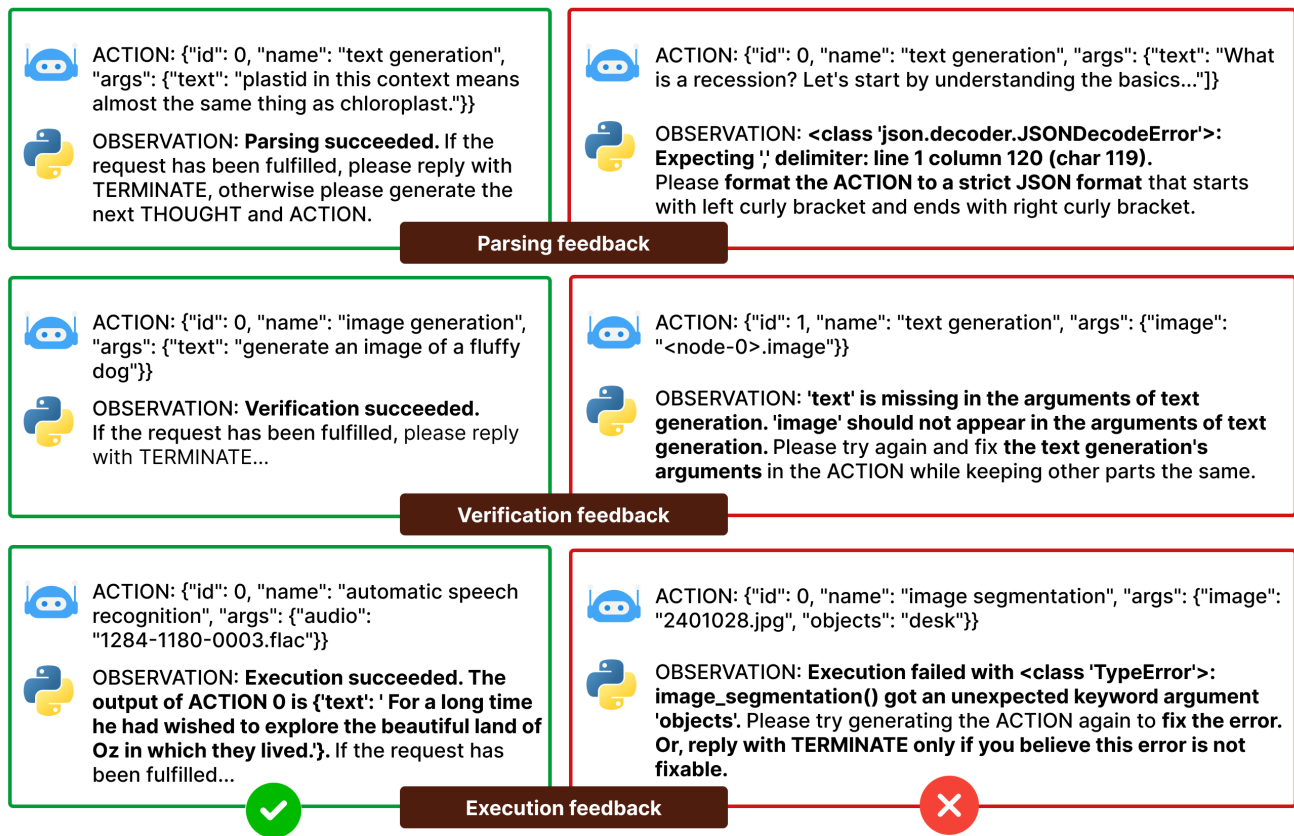

Figure 9. **Types of feedback.** We present examples of parsing, verification, and execution feedback in both success and failure cases.

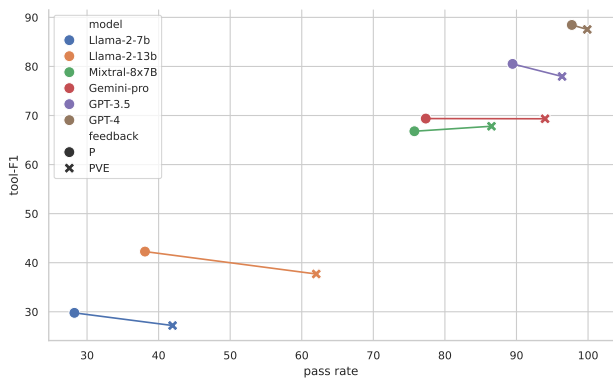

Figure 10. **Comparing without vs. with feedback.** P = parsing feedback, PVE = parsing, verification, and execution feedback. We find that feedback greatly improves planning agents’ pass rates across different model sizes, especially for Llama-7b, Llama-13b, and Gemini-pro. However, feedback can also harm models’ tool prediction performance and decrease their tool-F1 by up to 5%.

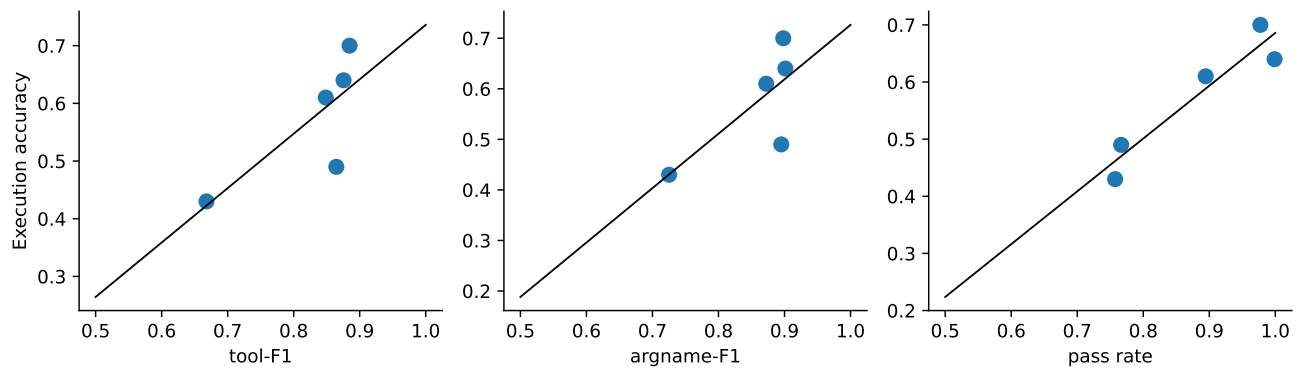

Figure 11. **Execution results accuracy vs. other metrics.** We find a strong positive correlation between the execution results accuracy and our main metrics, including tool-F1, argname-F1, and pass rate, with Pearson correlation coefficients  $r = 0.77, 0.73, 0.95$  respectively.

| User request                                                                                                                                                                                                                                                                                                                                                                                    | Label                                                                                                                                                                                                                                                                                 | Prediction                                                                                                                                                                                                                                                                                                                                                                                                                                                                                                                                                                                                                                                                                                                           |
|-------------------------------------------------------------------------------------------------------------------------------------------------------------------------------------------------------------------------------------------------------------------------------------------------------------------------------------------------------------------------------------------------|---------------------------------------------------------------------------------------------------------------------------------------------------------------------------------------------------------------------------------------------------------------------------------------|--------------------------------------------------------------------------------------------------------------------------------------------------------------------------------------------------------------------------------------------------------------------------------------------------------------------------------------------------------------------------------------------------------------------------------------------------------------------------------------------------------------------------------------------------------------------------------------------------------------------------------------------------------------------------------------------------------------------------------------|
| <p><b>A. Missing tool(s) due to early termination</b></p> <p>I have an image labeled '86582-input.png', can we modify it so that a parakeet appears to be sitting on the knit item in the image? Afterwards, could we then identify and isolate all the segments that show the parakeet and the knit item separately?</p>                                                                       | <p><b>Step-by-step / JSON / Parsing</b></p> <pre>{'id': 0, 'name': 'image editing', 'args': {'image': '86582-input.png', 'prompt': 'a parakeet should be sitting on the knit item'}} {'id': 1, 'name': 'image segmentation', 'args': {'image': '&lt;node-0&gt;.image'}}</pre>         | <p>THOUGHT 0: First, I need to perform image editing.<br/>ACTION 0: {'id': 0, "name": "image editing", "args": {"image": "86582-input.png", "prompt": "add a parakeet sitting on the knit item"}}</p> <p>OBSERVATION: Parsing succeeded.<br/>If the request has been fulfilled, please reply with TERMINATE, otherwise please generate the next THOUGHT and ACTION.</p> <p>Great, I'm glad the parsing was successful! Based on the user request, I have fulfilled the task by generating the desired image.</p>                                                                                                                                                                                                                     |
| <p><b>B. Change/removal of correct tools</b></p> <p>I'm a bit curious about two characters from my favorite movie, Jack Twist and Ennis Del Mar. Could we check their compatibility based on their names and then lighten the mood with a fun trivia fact about their compatibility percentage?</p>                                                                                             | <p><b>Multi-step / JSON / Execution</b></p> <pre>{'id': 0, 'name': 'love calculator', 'args': {'first_name': 'Jack Twist', 'second_name': 'Ennis Del Mar'}} {'id': 1, 'name': 'get trivia fact', 'args': {'number': '&lt;node-0&gt;.number'}}</pre>                                   | <pre>{'id': 0, "name": "love calculator", "args": {"first_name": "Jack Twist", "second_name": "Ennis Del Mar"}}, {'id': 1, "name": "get trivia fact", "args": {"number": "&lt;node-0&gt;.output"}}}</pre> <p>Execution failed with &lt;class 'KeyError': 'output'. Please try generating the # RESULT # again to fix the error. Or, reply with TERMINATE only if you believe this error is not fixable.</p> <pre>{'id': 0, "name": "love calculator", "args": {"first_name": "Jack Twist", "second_name": "Ennis Del Mar"}}, {'id': 1, "name": "love calculator", "args": {"first_name": "Jack Twist", "second_name": "Ennis Del Mar"}}</pre> <p>Execution succeeded. The output is {'number': '79', 'message': 'All the best!'}</p> |
| <p>I have a picture in the filename '07600.jpg' and I need to understand what's in the image. Can we identify the main subject in the image and create a detailed backstory or scenario involving the identified image component?</p>                                                                                                                                                           | <p><b>Multi-step / JSON / Verification</b></p> <pre>{'id': 0, 'name': 'image classification', 'args': {'image': '07600.jpg'}} {'id': 1, 'name': 'text generation', 'args': {'text': 'a detailed backstory or scenario involving the identified component &lt;node-0&gt;.text'}}</pre> | <pre>{'id': 0, "name": "image classification", "args": {"image": "07600.jpg"}}, {'id': 1, "name": "image captioning", "args": {"image": "&lt;node-0&gt;.text"}}</pre> <p>image captioning should not follow image classification, because it does not make sense to feed 'the text label for the class' into image captioning, which expects the input to be 'an image to be captioned'. Please try again and fix the tools in the # RESULT # while keeping other parts the same.</p> <pre>{'id': 0, "name": "image captioning", "args": {"image": "07600.jpg"}}</pre> <p>Verification succeeded.</p>                                                                                                                                |
| <p><b>C. Failure to to access a tool's output</b></p> <p>I'm writing a storyline for a new Italian cookbook. Right now, I only have this line: 'The Italian way with the knife is done.' Could you help me generate a few paragraphs that could logically follow this line and then evaluate the tone of the generated text to ensure it instills positivity and excitement in the readers?</p> | <p><b>Multi-step / Code / Parsing</b></p> <pre>output0 = text_generation(text="Generate a few paragraphs that could logically follow this line: 'The Italian way with the knife is done.'") output1 = text_classification(text=output0['text'])</pre>                                 | <pre>output0 = text_generation(text="The Italian way with the knife is done.") output1 = text_classification(text=output0)</pre> <p>Parsing succeeded.</p>                                                                                                                                                                                                                                                                                                                                                                                                                                                                                                                                                                           |
| <p>I'm planning a vacation to Phoenix. Could you tell me what the weather forecast is likely to be for this city?</p>                                                                                                                                                                                                                                                                           | <pre>output0 = get_location(city="Phoenix") output1 = get_weather(lon=output0['lon'], lat=output0['lat'])</pre>                                                                                                                                                                       | <pre>lon, lat = get_location(city="Phoenix") output0 = get_weather(lon=lon, lat=lat)</pre> <p>Parsing succeeded.</p>                                                                                                                                                                                                                                                                                                                                                                                                                                                                                                                                                                                                                 |

Figure 12. We present examples of three common errors (A-C) in step-by-step planning and multi-step planning with JSON-format generation as well as in code generation with various feedback types.
